# Supplementary material
Source: Springer Nature journal article supplement (https://www.springermedizin.de/resource/supplementary/13002_2007_102_MOESM2_ESM.pdf/9627174)
Supplement: MOESM2 [file 9627174]

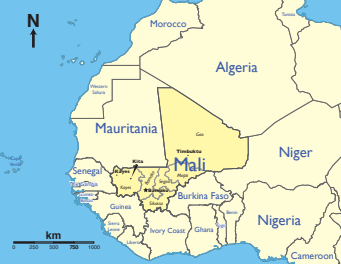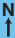

Morocco

Algeria

Mauritania

Niger

Mali

Senegal

Guinea

Burkina Faso

Nigeria

Ivory Coast

Ghana

Cameroon

km

0 250 500 750 1000
